# Supplementary material for: Immunization with alkyl hydroperoxide reductase subunit C reduces Fusobacterium nucleatum load in the intestinal tract
Source: PubMed Central journal article supplement (PMC5585165; doi:10.1038/s41598-017-11127-x), 2017-09-05
Supplement: 41598_2017_11127_MOESM1_ESM.pdf [file 41598_2017_11127_MOESM1_ESM.pdf]

# **Immunization with alkyl hydroperoxide reductase subunit C reduces *Fusobacterium nucleatum* load in the intestinal tract**

Song-He Guo<sup>1#</sup>, Hai-Fang Wang<sup>1#</sup>, Zhi-Gang Nian<sup>1</sup>, Yi-Dan Wang<sup>3</sup>, Qiu-Yao Zeng<sup>2</sup>,  
Ge Zhang<sup>1\*</sup>

<sup>1</sup>Department of Microbial and Biochemical Pharmacy, School of Pharmaceutical Sciences, Sun Yat-sen University, Guangzhou, China

<sup>2</sup>Department of Clinical Laboratory Medicine, Sun Yat-sen University cancer center, Guangzhou, China, Guangzhou, China

<sup>3</sup>Department of School of Life Science, Sun Yat-sen University, Guangzhou, China

# Song-He Guo and Hai-Fang Wang contributed equally to this work.

\* **Corresponding Author:** Zhang Ge, Department of Microbial and Biochemical Pharmacy, School of Pharmaceutical Sciences, Sun Yat-sen University, No.132 Waihuandong Road, University Town, Guangzhou 510006, China. Tel: 86-20-39943027; Fax: 86-20-39943021; E-mail: [zhangge@mail.sysu.edu.cn](mailto:zhangge@mail.sysu.edu.cn)

**Supplementary Table 1.** The prediction of antigenic determinants for the AhpC protein among *F. nucleatum* and other related bacteria.

| n | <i>Fusobacterium nucleatum</i> | <i>Helicobacter pylori</i> | <i>Campylobacter jejuni</i> | <i>Streptococcus zooepidemicus</i> | <i>Bacillus anthracis</i> | <i>Burkholderia pseudomallei</i> |
|---|--------------------------------|----------------------------|-----------------------------|------------------------------------|---------------------------|----------------------------------|
| 1 | IGRKVPEFK                      | IAFDKRVKDFHEKGFN           | PKDF                        | TNEDLKG                            | TEVKPFKA                  | SPIKPFKA                         |
| 2 | AFKKGEKDF                      | SIDTPVEEV                  | AFDKRYEEFKNRGI              | TELGDLQEYETLKSLG                   | QVTDESLKGKWS              | QVSDETLKGKWS                     |
| 3 | TELEDLQDNYEAFKKEGAE            | KNTPVEKGGIG                | WKNTPVNEGG                  | AWHDDSDV                           | TELEDLQNQ                 | TELGDLAERYAE                     |
| 4 | WADHSERIKKVT                   | DITKSISRDYDVLV             | LTKQIAR                     | QYVRKHPGEVCPAKWKEGAE               | GDPTRTI                   | AWHDTSDTIA                       |
| 5 | VHDNGIGRAKELLRKLQG             | DKGRNAEMLR                 | TNEHGEVC                    | LTPSL                              | VRNNPGEVCP                | HPGEVCPAKWTPGADTLTPSL            |
| 6 | FVAEHGEVCPAKWQPGSETLKPSL       | GWRKGDKGMKA                | AGWNKGDEGMKANPKG            |                                    | KWQEGSATLKPSL             |                                  |
| 7 |                                |                            | YLGKNEAKL                   |                                    |                           |                                  |

| n | <i>Salmonella typhimurium</i> | <i>Lactobacillus brevis</i> | <i>Escherichia coli</i>     | <i>Bifidobacterium longum</i>  | <i>Bacteroides fragilis</i>       | <i>Clostridium butyricum</i> |
|---|-------------------------------|-----------------------------|-----------------------------|--------------------------------|-----------------------------------|------------------------------|
| 1 | KIKPFKNQAFKNGEF               | TELGDLADH                   | TKIKPFKNQAFKNGEF            | ELTDFK                         | QMPEFK                            | INKKVSDF                     |
| 2 | EVTEKDTEGRW                   | QADTEI                      | EITEKDTEGRW                 | QNEFHEVTKDDV                   | QNGSFKTVSSSEVKG                   | YQNGEFKEVTLESIKG             |
| 3 | GIGRDASDLLRRIKA               | SISEDFEF                    | TELGDVADHYEELQKLG           | TELEDAENYAKFKEIG               | ELVDVAEKYEQ                       | ADPTGRLARDFEVMIEEGLAL        |
| 4 | DPTGALTRNFDNMREDEGLADRA       | EQSAEVGK                    | AWHSSSETIA                  | WHDANEKIAK                     | NPEGKIKIAEIQDNNIGRNA<br>DELLRKVEA | HDLGIGRSADELLRKKVQ           |
| 5 | HPGEVCPAKWKEGEA               | DVLN                        | DPTGALTRNFDNMREDEGLA<br>DRA | KDLDTYNEADGVAERGFIVSP<br>EGKVV | KWKKGEATLKPSI                     | VAEHGDQVCPAKWQPGE            |
| 6 |                               | DPQGTVRS                    | HPGEVCPAKWKEGEA             | SSNVGRNAEELLRRVQ               |                                   |                              |
| 7 |                               | GEQTLKPGTDLVG               |                             | TPGEETIEPSL                    |                                   |                              |

**Supplementary Table 2.** Relationship between the OD value of IgG/IgA antibodies against Fn-AhpC and the clinicopathological variables in 258 patients with CRC.

| Characteristics                  | n   | IgG<br>(Means±SD) | P     | IgA<br>(Means±SD) | P     |
|----------------------------------|-----|-------------------|-------|-------------------|-------|
| Gender                           |     |                   | 0.643 |                   | 0.471 |
| Male                             | 144 | 0.313±0.298       |       | 0.307±0.195       |       |
| Female                           | 114 | 0.285±0.298       |       | 0.324±0.186       |       |
| Age (y)                          |     |                   | 0.288 |                   | 0.068 |
| <60                              | 153 | 0.323±0.295       |       | 0.297±0.186       |       |
| ≥60                              | 105 | 0.255±0.241       |       | 0.341±0.196       |       |
| Tumour volume (cm <sup>3</sup> ) |     |                   | 0.163 |                   | 0.324 |
| ≥8.0                             | 83  | 0.247±0.230       |       | 0.338±0.205       |       |
| <8.0                             | 175 | 0.339±0.304       |       | 0.311±0.189       |       |
| Histological differentiation     |     |                   | 0.587 |                   | 0.424 |
| Well                             | 25  | 0.338±0.314       |       | 0.322±0.187       |       |
| Moderate or poor                 | 233 | 0.258±0.355       |       | 0.350±0.181       |       |
| pT classification                |     |                   | 0.315 |                   | 0.556 |
| T1+T2                            | 65  | 0.234±0.269       |       | 0.299±0.199       |       |
| T3+T4                            | 193 | 0.309±0.272       |       | 0.316±0.186       |       |
| pN classification                |     |                   | 0.130 |                   | 0.285 |
| No                               | 152 | 0.326±0.310       |       | 0.299±0.168       |       |
| Yes                              | 106 | 0.235±0.190       |       | 0.324±0.193       |       |
| pM classification                |     |                   | 0.108 |                   | 0.147 |
| No                               | 205 | 0.323±0.285       |       | 0.308±0.186       |       |
| Yes                              | 53  | 0.205±0.229       |       | 0.368±0.199       |       |
| Stage                            |     |                   | 0.125 |                   | 0.026 |
| I + II                           | 55  | 0.335±0.303       |       | 0.282±0.153       |       |
| III +IV                          | 203 | 0.245±0.219       |       | 0.328±0.196       |       |
| CEA (µg/ml)                      |     |                   | 0.750 |                   | 0.352 |
| < 5                              | 146 | 0.310±0.291       |       | 0.295±0.201       |       |
| ≥ 5                              | 112 | 0.290±0.267       |       | 0.318±0.175       |       |
| CA19-9 (U/ml)                    |     |                   | 0.761 |                   | 0.068 |
| < 35                             | 206 | 0.297±0.279       |       | 0.293±0.188       |       |
| ≥ 35                             | 52  | 0.319±0.281       |       | 0.350±0.197       |       |

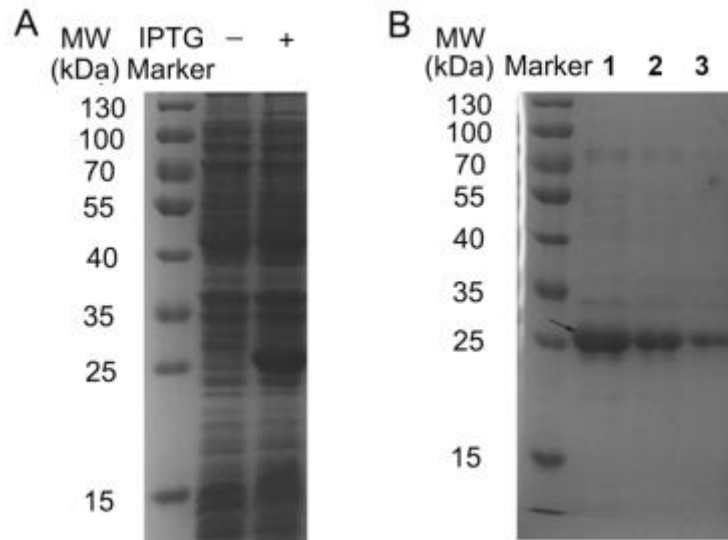

**Supplementary Figure 1.** Complete figures showing the expression of recombinant Fn-AhpC after IPTG induction are provided in Fig. 1A and Fig. 1B. (A) Recombinant AhpC expression in the absence (-) or presence (+) of 0.5 mM IPTG was detected using 12% SDS-PAGE and Coomassie brilliant blue staining. (B) The purification of recombinant AhpC. The recombinant AhpC with a His tag was purified using a Ni-NTA column after IPTG induction. Supplementary Fig. 1A was included in Fig. 1A of this manuscript; lane 2 in Supplementary Fig. 1B was included in Fig. 1B of this manuscript.

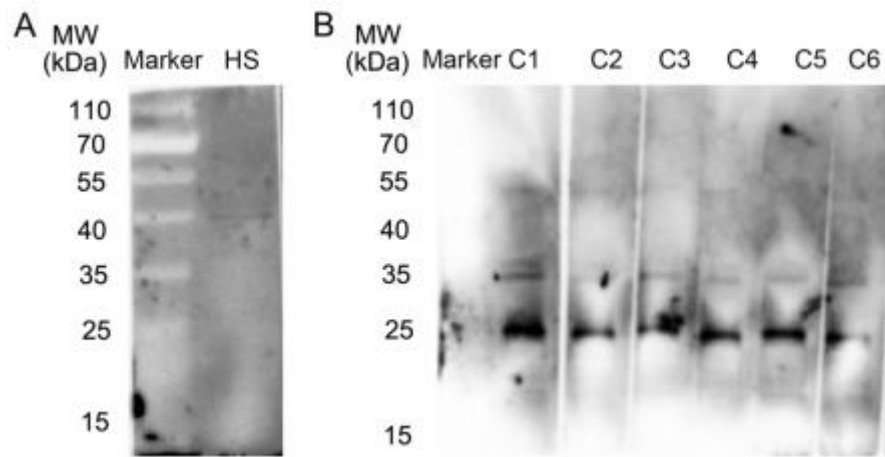

**Supplementary Figure 2.** Complete figures of the antigens reactive with anti-AhpC-IgA in Fig. 1D are shown. (A) The membrane strips were incubated with pooled serum from 6 Fn-negative healthy individuals. (B) The membrane strips were incubated with separated serum from 6 Fn-positive CRC patients (lane C1-C6). Notably, the gels in Supplementary Fig. 2 were run under the same conditions, and Western blotting was performed using the same set of materials. Supplementary Fig. 2 was included in Fig. 1D of this manuscript.

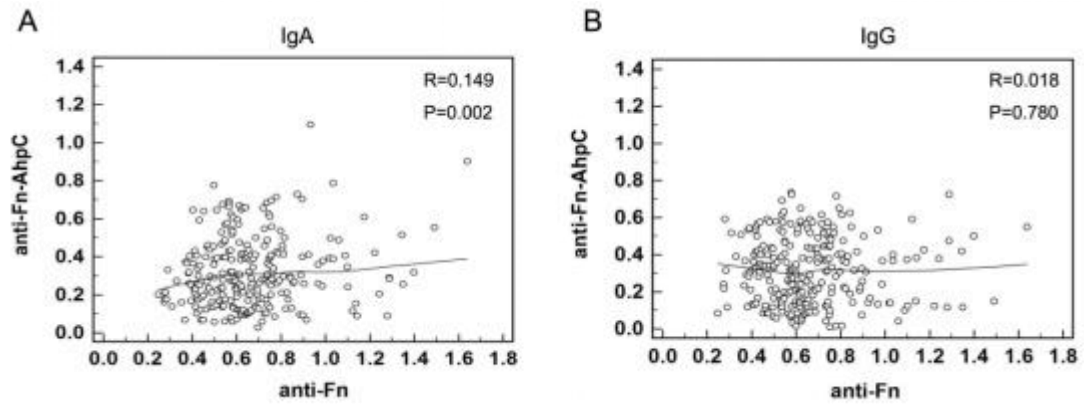

**Supplementary Figure 3.** The correlation between the levels of antibodies to *F. nucleatum* bacteria and AhpC antigen in serum of CRC patients were analysed using Pearson's correlation coefficient and linear regression.
